# Supplementary material for: Stem cell-like transcriptional reprogramming mediates metastatic resistance to mTOR inhibition
Source: PubMed Central journal article supplement — Oncogene. 2016 Dec 19;36(19):2737–49. doi: 10.1038/onc.2016.427 (PMC5442428; doi:10.1038/onc.2016.427), 2016-12-19
Supplement: onc2016427x17.pdf [file onc2016427x17.pdf]

**Table S5. Predicted EVI1 binding sites and primers used for ChIP assays.**

| Gene                                                         | Genomic coordinates (hg19)<br>Forward/reverse (consensus binding site)                                     | Forward primer (5'-3') | Reverse primer (5'-3') |
|--------------------------------------------------------------|------------------------------------------------------------------------------------------------------------|------------------------|------------------------|
| <b>Predicted targets (Transfac, GSEA)</b>                    |                                                                                                            |                        |                        |
| <i>SCUBE3</i> (1)                                            | chr6:35,178,411-35,178,420<br>Reverse (V\$EVI1_05): TTTTCTATATATTATCTCATTAA                                | CCAAACACTTGGGCTTTTGT   | GGGATAAAAACCTCGTAGGG   |
| <i>SCUBE3</i> (2)                                            | chr6:35,179,860-35,179,868<br>Reverse (V\$EVI1_06): ACCATTCTCTTGTGGGGGCAAA                                 | AGCTCCTCGGCTCTCTCTCT   | TGTGTAGGGTTGGAGGACAAG  |
| <i>TCF4</i>                                                  | chr18:53,256,680-53,256,686<br>Forward (V\$EVI1_06): ACAGATTACAAGATTATGCACCT                               | TGGTGAAAATGCAAAAACC    | TCTCACATGTGTATCCCCAAA  |
| <b>mTOR pathway</b>                                          |                                                                                                            |                        |                        |
| <i>AKT3</i>                                                  | chr1:244,008,880-244,008,896<br>Forward (V\$EVI1_02 and V\$EVI1_04): AAAAAAAAAAGAAAAGA AAAGAAAAAGAAT       | TGAGGCTCCCAAGACAGATT   | CCTGGGTGCTACAGTGAGAA   |
| <i>RHEB</i>                                                  | chr7:151,218,309-151,218,316<br>Reverse (V\$EVI1_06): GTCGTTTTTATCCTG TGGATTCCGAT                          | AACACCGTGGTGAGGGTATC   | CATGAAATGTTGAGGTTTACGC |
| <i>RPS6KA1</i> (1)                                           | chr1:26,854,187-26,854,197<br>Forward (V\$EVI1_02): TCTCAAAAAGAAAAGAAAAAATTA                               | CAGCCTGTTGACAGAGCAAG   | CTGCAGCCTTGAACCTTCTGG  |
| <i>RPS6KA1</i> (2)                                           | chr1:26,870,070-26,870,080<br>Forward (V\$EVI1_03 and V\$EVI1_05): CCCCTGAAGATAAGATTGTGTCTCC               | CACCCACTCCTCCATCTGTC   | TGCCTAAAACCCCTTCTCCT   |
| <i>RPTOR</i>                                                 | chr17:78,519,829-78,519,843<br>Forward (V\$EVI1_04): CTAATTCAGATAATAAAAAGTTAAGCAAAT                        | TGGTTGAAAATGGAAAATGC   | GCATGTAAATACTCGCAATGCT |
| <b>Lung metastasis signature</b>                             |                                                                                                            |                        |                        |
| <i>FSCN1</i>                                                 | chr7:5,630,468-5,630,477<br>Reverse (V\$EVI1_02): CCCGAGATTCTCTTTTC CCCCGTCCGG                             | AAACAAACAAAACCCCGAGA   | GTGAGTGAGTGAGCCCTGGT   |
| <i>SPARC</i> (1)                                             | chr5:151,068,565-151,068,551<br>Forward (V\$EVI1_04): GGTAAGAGCAAATGCAAAGATACTGGGCA                        | GGCCCTAAGGAGGTGACATT   | ACAAGTCTGAGCCACCATGC   |
| <i>SPARC</i> (2)                                             | chr5:151,067,151-151,067,139<br>Forward (V\$EVI1_02, V\$EVI1_03 and V\$EVI1_05): ATTGAACAGATAAGGTAATTGATGA | CCAGGTGATCATAGGCAAGTTA | GACATCTAGCTGGTGGACCTG  |
| <i>SPARC</i> (3)                                             | chr5:151,066,999-151,066,992<br>Forward (V\$EVI1_02 and V\$EVI1_06): ACTGTACAGACAAGACAAGCTGCTA             | CCAGTTCCAAATCATCAAGGA  | TTCAAGGGGGTTGTATTTGC   |
| <b>SOX9 target based on ChIP data (probe A_17_P10450589)</b> |                                                                                                            |                        |                        |
|                                                              | chr17:70,117,112 -70,117,268                                                                               | CTCTAAGGTGAGGCGGAGTA   | CACCCCTTCTCTTCTCCTCC   |
