# Supplementary material for: Stem cell-like transcriptional reprogramming mediates metastatic resistance to mTOR inhibition
Source: PubMed Central journal article supplement — Oncogene. 2016 Dec 19;36(19):2737–49. doi: 10.1038/onc.2016.427 (PMC5442428; doi:10.1038/onc.2016.427), 2016-12-19
Supplement: onc2016427x18.pdf [file onc2016427x18.pdf]

**Table S6. Predicted EVI1 targets used in the analysis of drug responses across cancer cell lines.**

| <b>Target gene</b> | <b>Represented in the microarray (y/n)</b> |
|--------------------|--------------------------------------------|
| <i>ACCN1</i>       | y                                          |
| <i>ARPC2</i>       | y                                          |
| <i>C18orf25</i>    | y                                          |
| <i>CITED2</i>      | y                                          |
| <i>CREB5</i>       | y                                          |
| <i>GRIN2B</i>      | y                                          |
| <i>IL17B</i>       | y                                          |
| <i>MAP2</i>        | y                                          |
| <i>MAP4K5</i>      | y                                          |
| <i>NRAS</i>        | y                                          |
| <i>PCF11</i>       | y                                          |
| <i>PDHA2</i>       | y                                          |
| <i>RNF11</i>       | y                                          |
| <i>TCF4</i>        | y                                          |
| <i>USP2</i>        | y                                          |
| <i>VAMP1</i>       | y                                          |
| <i>KLF14</i>       | n                                          |
| <i>SCUBE3</i>      | n                                          |
| <i>SENP1</i>       | n                                          |
| <i>SLC9A9</i>      | n                                          |
